# Supplementary material for: Molecular architecture of the tumor microenvironment caused by BRCA1 and BRCA2 somatic mutations in human lung adenocarcinoma
Source: eLife journal article supplement (doi:10.7554/elife.110662), 2026-05-26

Supplementary Figure. Uncropped immunoblot images

**A. LDHA, S100A10, GAPDH shRNA (Corresponding to Figure 7D).**

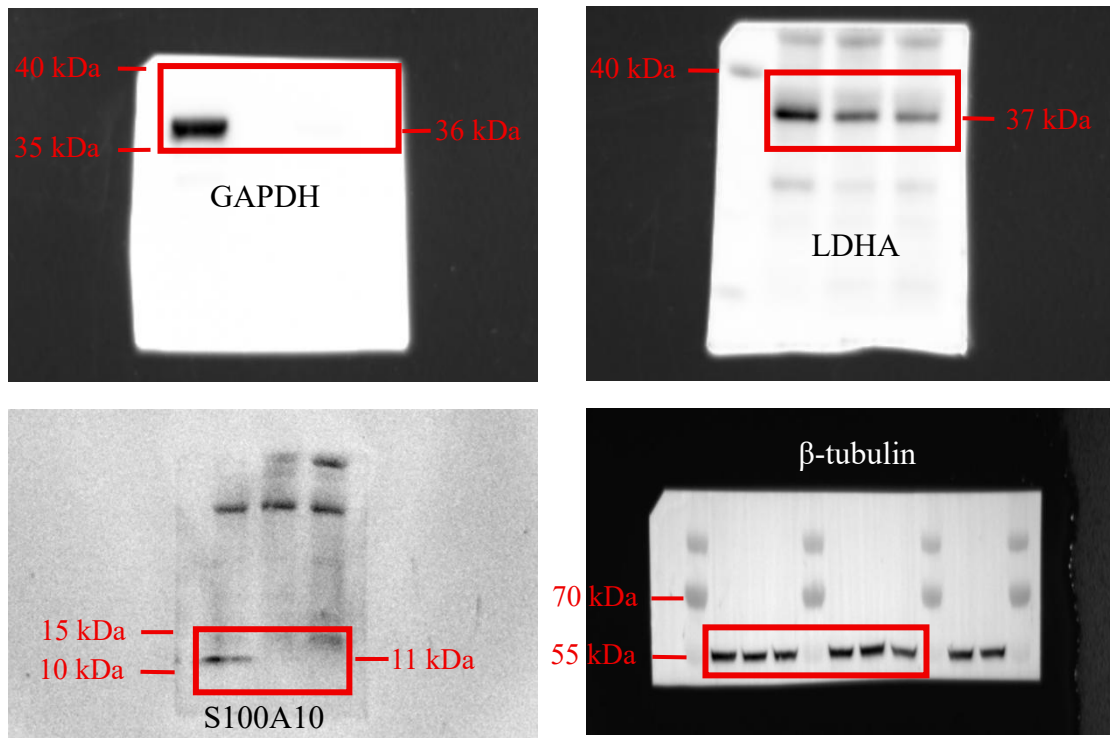

**B. Vorinostat & Belinostat Drug treatment 48h (Corresponding to Figure 7I).**

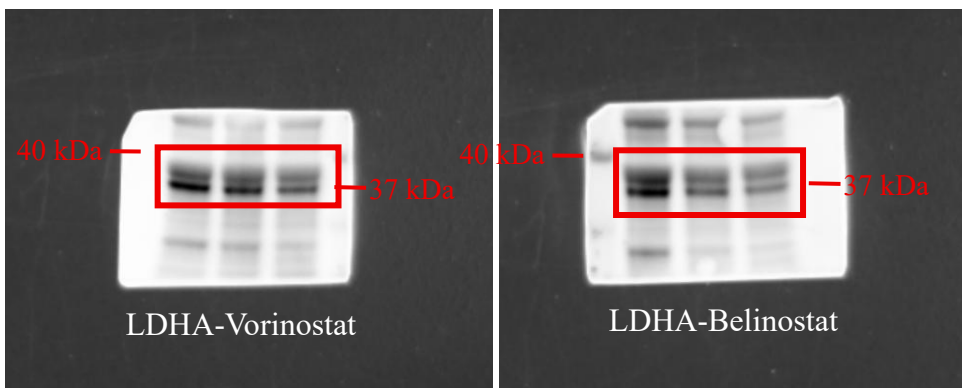

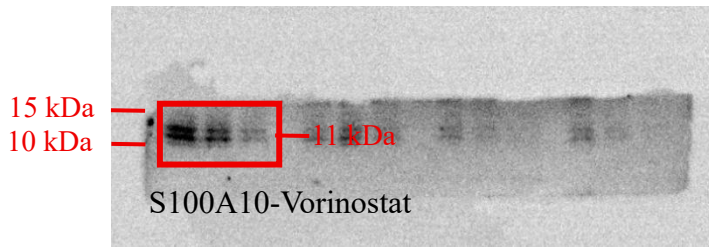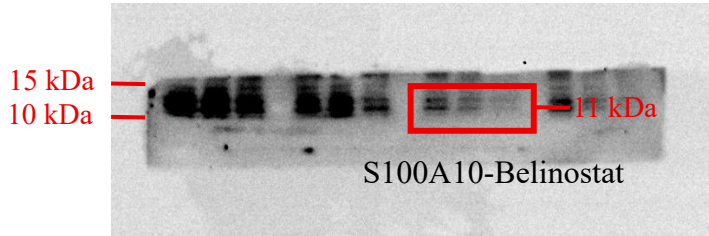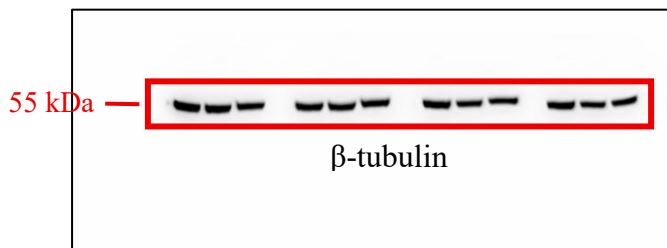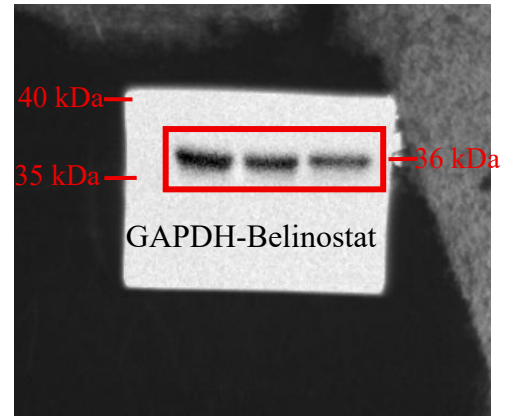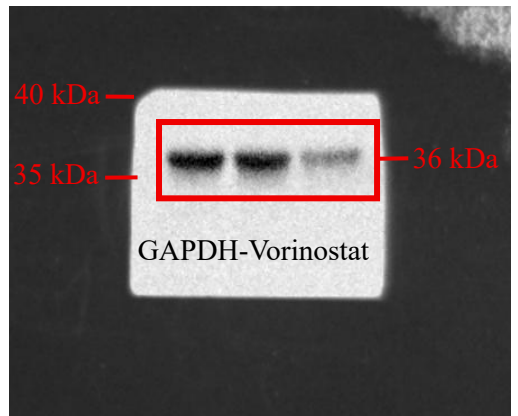

Supplement: fig7-data1 [file elife-110662-fig7-data1-v1.pdf]
